# Supplementary material
Source: Research Square preprint supplement (doi:10.21203/rs.3.rs-9321373/v1)
Supplement: Supplementary file 1 [file 0b169c1fe0c51311a78ab53b.pdf]

JJIAM  
CERTIFICATION FOR MANUSCRIPT SUBMISSION

Title: Cultivating Constraint: A Dynamical-Systems Theory of Bonsai Growth

Author(s): J. J. SEGURA

I/We hereby certify to the editor of *the Japan Journal of Industrial and Applied Mathematics* that my/our manuscript meets all the following conditions;

1. None of the material of the manuscript has been published elsewhere in whole or in part, except in abstract form.
2. The manuscript is not simultaneously under consideration for publication elsewhere in a journal, a book, or electronic media.
3. All authors have agreed to be so listed and have seen and approved the manuscript, its contents, and its submission to JJIAM.
4. Written permission from the copyright holder(s) of any table(s) and /or figure(s) cited in the manuscript has been obtained, and citation is indicated in the manuscript.

Name of the author for correspondence (block letters): JUAN JOSE SEGURA

Signature:  \_\_\_\_\_

Date: 04/10/2024
